# Supplementary material for: What kills us and what moves us: A comparative discourse analysis of heart disease and breast cancer
Source: PubMed Central journal article supplement (PMC6495432; doi:10.1177/2055207619844865), 2019-05-01
Supplement: Supplemental_Material.pdf [file Supplemental_Material.pdf]

## **Appendix**

The structure of DocuScope language clusters, dimensions, and language action types (LATs) are shown in the following list. Clusters are bold, dimensions are italicized, and LATs are normal text.

### **Subjective Register**

#### *First Person*

First Person

#### *First Person Personal*

Self-Disclosure

Self-Reluctance

Autobiography

#### *Personal Register*

Private Thinking

Disclosure

Intensity

Immediacy

Subjective Time

Subjective Perception

#### *Confidence*

Confidence

#### *Uncertainty*

Uncertainty

### **Emotion**

#### *Positive Emotion*

Positivity

#### *Negative Emotion*

Negativity (spurious)

Anger

Fear

Sad

Reluctance

Apology

### **Description**

#### *Sensory Language*

Sense Property

Sense Object

#### *Space Movement*

Space Relation

Scene Shift

Motions

#### *Dialog Orality*

Dialog Cues

Oral Cues

### **Institutional Register**

*Public Sources*

In Media  
Common Authorities

*Public Responsibility*

Responsibility

*Positive Values*

Standards Pos

Innovations

*Negative Values*

Standards Neg (spurious - disease)

**Academic Register**

*Abstract Thought*

Abstract Concepts (spurious)

Communicator Role

Lang Ref (spurious)

*Citing Others*

Precedent Defending

Received POV

Confirmed Thought

Citations

Neg Citation

Repair Citation

Speculative Citation

Authoritative Citation

Contested Citation

Attack Citation

Quotation

*Guide thru Complexity*

Meta-discourse

**Future**

*Future*

Project Ahead

Predicted Future

**Past**

*Past*

Project Back

Future in Past

**Personal Relations**

*Positive Relations*

Positive Attribution

Promise

Self Promise

Reassure

Reinforce

Acknowledge

Accept Agree

*Inclusive Relations*

Inclusive

*Negative Relations*

Negative Attribution

Negative Relation

**Reasoning**

*Constructive Reasoning*

Reason Forward

Reason Backward

Direct Reasoning

Support

*Contingent Reasoning*

Contingency

*Oppositional Reasoning*

Deny Disclaim

Concessive

Resistance

**Interactive**

*Inquiry*

Curiosity

Question

Future Question

Open Query

*Addressing Other*

Attention Grabber

You Attention

You Reference

Request

Follow Up

Feedback

Pos Feedback

Neg Feedback

Prior Knowledge

**Elaboration**

*General Example Except*

Generalization

Example

Exceptions

*Comparison*

Comparison

Resemblances

*Defining Specifying*

Specifiers

Definition

Numbers

**Reporting**

*Reporting States*

Reporting States

*Reporting Events*

Reporting Events

*Reporting Process*

Recurring Events

GenericEvents

Sequence

Mature Process

Cause

Consequence

*Reporting Change*

Transformation

Substitution

Updates

Precedent Setting

**Directing**

*Directives*

Imperative

Procedures

Move Body

Confirm Experience

Error Recovery

*Insistence*

Insist

*Prohibitive*

Prohibitive

**Narrative**

*Narrative Verbs*

Narrative Verbs

*Time Expressions*

Time Shift

Time Duration

Biographical Time

Time Date

*Narrative Background*

Aside

**Character**

*Personal Pronoun*

Person Pronoun

*Person Attribution*

Neutral Attribution

*Person Class*

Person Property
